# Supplementary material for: Incidence of induced abortion in Malawi, 2015
Source: PLOS journal article supplement (doi:10.1371/journal.pone.0173639), 2017-04-03
Supplement: S2 (10.1371/journal.pone.0173639.s002) [file journal.pone.0173639.s002]

| Module 1: Basic Information |                                                                                                                                                                                      |                                                   |                                              |                                                                                                                                                                                                                                                   |                                                  |
|-----------------------------|--------------------------------------------------------------------------------------------------------------------------------------------------------------------------------------|---------------------------------------------------|----------------------------------------------|---------------------------------------------------------------------------------------------------------------------------------------------------------------------------------------------------------------------------------------------------|--------------------------------------------------|
| No.                         | Questions and Filters                                                                                                                                                                | Responses                                         |                                              |                                                                                                                                                                                                                                                   |                                                  |
| 101                         | What is your position at this facility?<br><br>[Interviewer: circle the category that applies to the respondent.]                                                                    |                                                   | 01<br>02<br>03<br>04<br>05<br>06<br>07<br>96 | Gynecologist-obstetrician<br>General practitioner<br>Clinical officer<br>Medical assistant<br>Nurse-midwife technician/enrolled nurse midwife<br>Registered nurse midwife<br>Other nurse (e.g., community health nurse)<br>Other (specify): _____ |                                                  |
| 102                         | Gender of the respondent<br>[Interviewer: circle the category that applies to the respondent. Do not ask this question aloud.]                                                       |                                                   | 1<br>2                                       | Male<br>Female                                                                                                                                                                                                                                    |                                                  |
| 103                         | How old are you?                                                                                                                                                                     |                                                   |                                              | Years                                                                                                                                                                                                                                             |                                                  |
| 104                         | How many years have you worked in your current profession?<br><br>[If less than 12 months, enter "0".]                                                                               |                                                   |                                              | Years                                                                                                                                                                                                                                             |                                                  |
| 105                         | How many years have you worked in this facility?<br><br>[If less than 12 months, enter "0".]                                                                                         |                                                   |                                              | Years                                                                                                                                                                                                                                             |                                                  |
| 106                         | Which of the following gynecological and obstetric services does this facility offer?<br><br>[Interviewer: Please read out all relevant categories. Multiple responses are allowed.] | <b>Gynaecological obstetric services offered:</b> |                                              |                                                                                                                                                                                                                                                   |                                                  |
|                             |                                                                                                                                                                                      |                                                   | <b>No</b>                                    | <b>Yes</b>                                                                                                                                                                                                                                        |                                                  |
|                             |                                                                                                                                                                                      | a                                                 | 0                                            | 1                                                                                                                                                                                                                                                 | Gynaecological services                          |
|                             |                                                                                                                                                                                      | b                                                 | 0                                            | 1                                                                                                                                                                                                                                                 | Maternity and delivery services                  |
|                             |                                                                                                                                                                                      | c                                                 | 0                                            | 1                                                                                                                                                                                                                                                 | Antenatal care                                   |
|                             |                                                                                                                                                                                      | d                                                 | 0                                            | 1                                                                                                                                                                                                                                                 | Postnatal care                                   |
|                             |                                                                                                                                                                                      | e                                                 | 0                                            | 1                                                                                                                                                                                                                                                 | Family planning services                         |
|                             |                                                                                                                                                                                      | f                                                 | 0                                            | 1                                                                                                                                                                                                                                                 | HIV testing and counseling                       |
|                             |                                                                                                                                                                                      | g                                                 | 0                                            | 1                                                                                                                                                                                                                                                 | ART services                                     |
|                             |                                                                                                                                                                                      | h                                                 | m                                            | 1                                                                                                                                                                                                                                                 | STI services                                     |
|                             |                                                                                                                                                                                      | i                                                 | 0                                            | 1                                                                                                                                                                                                                                                 | PMTCT services                                   |
|                             |                                                                                                                                                                                      | j                                                 | 0                                            | 1                                                                                                                                                                                                                                                 | Cervical cancer screening                        |
|                             |                                                                                                                                                                                      | m                                                 | 0                                            | 1                                                                                                                                                                                                                                                 | Immunization                                     |
|                             |                                                                                                                                                                                      |                                                   |                                              |                                                                                                                                                                                                                                                   | Other (specify, limit to 2-3):<br>_____<br>_____ |
| m                           | 0                                                                                                                                                                                    | 1                                                 | None of the above                            |                                                                                                                                                                                                                                                   |                                                  |

|     |                                                                                                                                                                                                                                                                                                                                                                                                                                                                                                                       |   |                                  |   |                                        |
|-----|-----------------------------------------------------------------------------------------------------------------------------------------------------------------------------------------------------------------------------------------------------------------------------------------------------------------------------------------------------------------------------------------------------------------------------------------------------------------------------------------------------------------------|---|----------------------------------|---|----------------------------------------|
| 107 | <p>Which of the following items are available <u>and</u> functional at this facility?</p> <p><b>[Interviewer: Please read out all relevant categories. Multiple responses are allowed.]</b></p> <p><b>NOTE: Functionality applies to day of interview, that is, if the equipment is not working that day, it is not functional (0). For electricity, if there is a temporary power outage but the electricity will come back on when ESCOM returns it, then electricity is functional; otherwise, it is not.]</b></p> |   |                                  |   |                                        |
|     |                                                                                                                                                                                                                                                                                                                                                                                                                                                                                                                       | a | 0                                | 1 | Operating room                         |
|     |                                                                                                                                                                                                                                                                                                                                                                                                                                                                                                                       | b | 0                                | 1 | Instrument preparation room            |
|     |                                                                                                                                                                                                                                                                                                                                                                                                                                                                                                                       | c | 0                                | 1 | Outpatient department (OPD)            |
|     |                                                                                                                                                                                                                                                                                                                                                                                                                                                                                                                       | d | 0                                | 1 | Recovery room                          |
|     |                                                                                                                                                                                                                                                                                                                                                                                                                                                                                                                       | e | 0                                | 1 | Drug store                             |
|     |                                                                                                                                                                                                                                                                                                                                                                                                                                                                                                                       | f | 0                                | 1 | Laboratory                             |
|     |                                                                                                                                                                                                                                                                                                                                                                                                                                                                                                                       | g | 0                                | 1 | Blood transfusion service              |
|     |                                                                                                                                                                                                                                                                                                                                                                                                                                                                                                                       | h | 0                                | 1 | Intensive care unit (ICU)              |
|     |                                                                                                                                                                                                                                                                                                                                                                                                                                                                                                                       | i | 0                                | 1 | Sonogram (scanning)                    |
|     |                                                                                                                                                                                                                                                                                                                                                                                                                                                                                                                       | j | 0                                | 1 | Local anaesthetics (numbs one area)    |
|     |                                                                                                                                                                                                                                                                                                                                                                                                                                                                                                                       | k | 0                                | 1 | General anaesthetics (sedates patient) |
|     |                                                                                                                                                                                                                                                                                                                                                                                                                                                                                                                       | l | 0                                | 1 | Water                                  |
|     |                                                                                                                                                                                                                                                                                                                                                                                                                                                                                                                       | m | 0                                | 1 | Electricity / solar power              |
| n   | 0                                                                                                                                                                                                                                                                                                                                                                                                                                                                                                                     | 1 | Blood pressure machine           |   |                                        |
| o   | 0                                                                                                                                                                                                                                                                                                                                                                                                                                                                                                                     | 1 | Intravenous fluids               |   |                                        |
| p   | 0                                                                                                                                                                                                                                                                                                                                                                                                                                                                                                                     | 1 | Telephone or radio communication |   |                                        |
|     |                                                                                                                                                                                                                                                                                                                                                                                                                                                                                                                       |   |                                  |   |                                        |
| 108 | <p>Which of the following essential drugs and tests are available at this facility?</p> <p><b>[Interviewer: Read each item on the list.]</b></p> <p><b>NOTE: Again, availability refers to the day of interview. If the drug/test is not available the day you are there, please code it as No (0).]</b></p>                                                                                                                                                                                                          | a | 0                                | 1 | Oxytocin/ergometrine                   |
|     |                                                                                                                                                                                                                                                                                                                                                                                                                                                                                                                       | b | 0                                | 1 | Antibiotics                            |
|     |                                                                                                                                                                                                                                                                                                                                                                                                                                                                                                                       | c | 0                                | 1 | Analgesics                             |
|     |                                                                                                                                                                                                                                                                                                                                                                                                                                                                                                                       | d | 0                                | 1 | Sedatives                              |
|     |                                                                                                                                                                                                                                                                                                                                                                                                                                                                                                                       | e | 0                                | 1 | IV fluids                              |
|     |                                                                                                                                                                                                                                                                                                                                                                                                                                                                                                                       | f | 0                                | 1 | Hemoglobin test                        |
|     |                                                                                                                                                                                                                                                                                                                                                                                                                                                                                                                       | g | 0                                | 1 | Syphilis test                          |
|     |                                                                                                                                                                                                                                                                                                                                                                                                                                                                                                                       | h | 0                                | 1 | HIV test                               |
|     |                                                                                                                                                                                                                                                                                                                                                                                                                                                                                                                       | i | 0                                | 1 | Pregnancy test                         |
|     |                                                                                                                                                                                                                                                                                                                                                                                                                                                                                                                       | j | 0                                | 1 | Blood grouping test                    |

## Module 2: Postabortion Care

Now, I would like to ask you some questions regarding **medical care for patients treated at this facility with abortion complications, irrespective of whether the abortion was spontaneous or induced.** Among other things, I will ask about **the number of patients treated for such complications at your facility.** By abortion complications, we are referring to those complications that are severe enough to **need treatment** in a health facility. Abortion complications, as defined here, include not only the **extremely serious cases** such as those with sepsis or a perforated uterus, but also those cases which are termed "incomplete abortions," which are usually identified by heavy bleeding, and which present a somewhat less severe health risk to the woman, but which, nevertheless, need hospitalization. In answering the following set of questions concerning abortion complications, please keep this definition in mind.

**[Interviewer: Please note that the abortion-complication questions relate to both spontaneous and induced abortions. You should reiterate this as often as possible while completing this section.]**

**The following questions refer to all cases of abortions that are underway (spontaneous or induced), incomplete abortions and postabortion care.**

| 201 | <p>On average about how many deliveries take place at your facility each month?</p> <p><b>[Interviewer: if respondent can't answer for average month, probe for the total number in 2014.]</b></p> | <p>a. Deliveries per month <span style="float: right;"> <table border="1" style="display: inline-table; border-collapse: collapse; width: 40px; height: 20px;"> <tr><td style="width: 10px;"></td><td style="width: 10px;"></td><td style="width: 10px;"></td><td style="width: 10px;"></td></tr> </table> </span></p> <p style="text-align: center;"><b>OR</b></p> <p>b. Total number of deliveries during the 2014 calendar year <span style="float: right;"> <table border="1" style="display: inline-table; border-collapse: collapse; width: 40px; height: 20px;"> <tr><td style="width: 10px;"></td><td style="width: 10px;"></td><td style="width: 10px;"></td><td style="width: 10px;"></td></tr> </table> </span></p>                                                                                                                                                                                                                                                                                                                                                                                                                                                                                                                                                                                                                                                                                              |                                  |                                     |     |                 |    |      |   |                           |    |   |   |                                  |    |   |   |                                  |    |   |   |                       |    |   |   |                               |    |   |   |                           |    |   |   |                |    |   |   |                       |
|-----|----------------------------------------------------------------------------------------------------------------------------------------------------------------------------------------------------|-----------------------------------------------------------------------------------------------------------------------------------------------------------------------------------------------------------------------------------------------------------------------------------------------------------------------------------------------------------------------------------------------------------------------------------------------------------------------------------------------------------------------------------------------------------------------------------------------------------------------------------------------------------------------------------------------------------------------------------------------------------------------------------------------------------------------------------------------------------------------------------------------------------------------------------------------------------------------------------------------------------------------------------------------------------------------------------------------------------------------------------------------------------------------------------------------------------------------------------------------------------------------------------------------------------------------------------------------------------------------------------------------------------------------------|----------------------------------|-------------------------------------|-----|-----------------|----|------|---|---------------------------|----|---|---|----------------------------------|----|---|---|----------------------------------|----|---|---|-----------------------|----|---|---|-------------------------------|----|---|---|---------------------------|----|---|---|----------------|----|---|---|-----------------------|
|     |                                                                                                                                                                                                    |                                                                                                                                                                                                                                                                                                                                                                                                                                                                                                                                                                                                                                                                                                                                                                                                                                                                                                                                                                                                                                                                                                                                                                                                                                                                                                                                                                                                                             |                                  |                                     |     |                 |    |      |   |                           |    |   |   |                                  |    |   |   |                                  |    |   |   |                       |    |   |   |                               |    |   |   |                           |    |   |   |                |    |   |   |                       |
|     |                                                                                                                                                                                                    |                                                                                                                                                                                                                                                                                                                                                                                                                                                                                                                                                                                                                                                                                                                                                                                                                                                                                                                                                                                                                                                                                                                                                                                                                                                                                                                                                                                                                             |                                  |                                     |     |                 |    |      |   |                           |    |   |   |                                  |    |   |   |                                  |    |   |   |                       |    |   |   |                               |    |   |   |                           |    |   |   |                |    |   |   |                       |
| 202 | <p>Does this facility treat women with spontaneous abortions or complications from induced abortions?</p>                                                                                          | <table border="1" style="margin-left: auto; margin-right: auto; border-collapse: collapse;"> <tr> <td style="width: 20px; text-align: center;">0</td> <td>No -&gt; <b>[END INTERVIEW.]</b></td> </tr> <tr> <td style="text-align: center;">1</td> <td>Yes</td> </tr> </table>                                                                                                                                                                                                                                                                                                                                                                                                                                                                                                                                                                                                                                                                                                                                                                                                                                                                                                                                                                                                                                                                                                                                               | 0                                | No -> <b>[END INTERVIEW.]</b>       | 1   | Yes             |    |      |   |                           |    |   |   |                                  |    |   |   |                                  |    |   |   |                       |    |   |   |                               |    |   |   |                           |    |   |   |                |    |   |   |                       |
| 0   | No -> <b>[END INTERVIEW.]</b>                                                                                                                                                                      |                                                                                                                                                                                                                                                                                                                                                                                                                                                                                                                                                                                                                                                                                                                                                                                                                                                                                                                                                                                                                                                                                                                                                                                                                                                                                                                                                                                                                             |                                  |                                     |     |                 |    |      |   |                           |    |   |   |                                  |    |   |   |                                  |    |   |   |                       |    |   |   |                               |    |   |   |                           |    |   |   |                |    |   |   |                       |
| 1   | Yes                                                                                                                                                                                                |                                                                                                                                                                                                                                                                                                                                                                                                                                                                                                                                                                                                                                                                                                                                                                                                                                                                                                                                                                                                                                                                                                                                                                                                                                                                                                                                                                                                                             |                                  |                                     |     |                 |    |      |   |                           |    |   |   |                                  |    |   |   |                                  |    |   |   |                       |    |   |   |                               |    |   |   |                           |    |   |   |                |    |   |   |                       |
| 203 | <p>In which areas of this health facility are patients with abortion complications treated?</p> <p><b>[Interviewer: Please read out the list of wards and circle all that apply.]</b></p>          | <table border="1" style="width: 100%; border-collapse: collapse;"> <thead> <tr> <th style="width: 5%;"></th> <th style="width: 10%; text-align: center;">No</th> <th style="width: 10%; text-align: center;">Yes</th> <th style="width: 75%;"></th> </tr> </thead> <tbody> <tr> <td>a.</td> <td style="text-align: center;">0</td> <td style="text-align: center;">1</td> <td>General outpatient clinic</td> </tr> <tr> <td>b.</td> <td style="text-align: center;">0</td> <td style="text-align: center;">1</td> <td>Outpatient maternal-child clinic</td> </tr> <tr> <td>c.</td> <td style="text-align: center;">0</td> <td style="text-align: center;">1</td> <td>Outpatient gynaecological clinic</td> </tr> <tr> <td>d.</td> <td style="text-align: center;">0</td> <td style="text-align: center;">1</td> <td>General surgical ward</td> </tr> <tr> <td>e.</td> <td style="text-align: center;">0</td> <td style="text-align: center;">1</td> <td>Gynaecological/Obstetric ward</td> </tr> <tr> <td>f.</td> <td style="text-align: center;">0</td> <td style="text-align: center;">1</td> <td>Intensive care unit (ICU)</td> </tr> <tr> <td>g.</td> <td style="text-align: center;">0</td> <td style="text-align: center;">1</td> <td>Emergency ward</td> </tr> <tr> <td>h.</td> <td style="text-align: center;">0</td> <td style="text-align: center;">1</td> <td>Other ward (specify):</td> </tr> </tbody> </table> |                                  | No                                  | Yes |                 | a. | 0    | 1 | General outpatient clinic | b. | 0 | 1 | Outpatient maternal-child clinic | c. | 0 | 1 | Outpatient gynaecological clinic | d. | 0 | 1 | General surgical ward | e. | 0 | 1 | Gynaecological/Obstetric ward | f. | 0 | 1 | Intensive care unit (ICU) | g. | 0 | 1 | Emergency ward | h. | 0 | 1 | Other ward (specify): |
|     | No                                                                                                                                                                                                 | Yes                                                                                                                                                                                                                                                                                                                                                                                                                                                                                                                                                                                                                                                                                                                                                                                                                                                                                                                                                                                                                                                                                                                                                                                                                                                                                                                                                                                                                         |                                  |                                     |     |                 |    |      |   |                           |    |   |   |                                  |    |   |   |                                  |    |   |   |                       |    |   |   |                               |    |   |   |                           |    |   |   |                |    |   |   |                       |
| a.  | 0                                                                                                                                                                                                  | 1                                                                                                                                                                                                                                                                                                                                                                                                                                                                                                                                                                                                                                                                                                                                                                                                                                                                                                                                                                                                                                                                                                                                                                                                                                                                                                                                                                                                                           | General outpatient clinic        |                                     |     |                 |    |      |   |                           |    |   |   |                                  |    |   |   |                                  |    |   |   |                       |    |   |   |                               |    |   |   |                           |    |   |   |                |    |   |   |                       |
| b.  | 0                                                                                                                                                                                                  | 1                                                                                                                                                                                                                                                                                                                                                                                                                                                                                                                                                                                                                                                                                                                                                                                                                                                                                                                                                                                                                                                                                                                                                                                                                                                                                                                                                                                                                           | Outpatient maternal-child clinic |                                     |     |                 |    |      |   |                           |    |   |   |                                  |    |   |   |                                  |    |   |   |                       |    |   |   |                               |    |   |   |                           |    |   |   |                |    |   |   |                       |
| c.  | 0                                                                                                                                                                                                  | 1                                                                                                                                                                                                                                                                                                                                                                                                                                                                                                                                                                                                                                                                                                                                                                                                                                                                                                                                                                                                                                                                                                                                                                                                                                                                                                                                                                                                                           | Outpatient gynaecological clinic |                                     |     |                 |    |      |   |                           |    |   |   |                                  |    |   |   |                                  |    |   |   |                       |    |   |   |                               |    |   |   |                           |    |   |   |                |    |   |   |                       |
| d.  | 0                                                                                                                                                                                                  | 1                                                                                                                                                                                                                                                                                                                                                                                                                                                                                                                                                                                                                                                                                                                                                                                                                                                                                                                                                                                                                                                                                                                                                                                                                                                                                                                                                                                                                           | General surgical ward            |                                     |     |                 |    |      |   |                           |    |   |   |                                  |    |   |   |                                  |    |   |   |                       |    |   |   |                               |    |   |   |                           |    |   |   |                |    |   |   |                       |
| e.  | 0                                                                                                                                                                                                  | 1                                                                                                                                                                                                                                                                                                                                                                                                                                                                                                                                                                                                                                                                                                                                                                                                                                                                                                                                                                                                                                                                                                                                                                                                                                                                                                                                                                                                                           | Gynaecological/Obstetric ward    |                                     |     |                 |    |      |   |                           |    |   |   |                                  |    |   |   |                                  |    |   |   |                       |    |   |   |                               |    |   |   |                           |    |   |   |                |    |   |   |                       |
| f.  | 0                                                                                                                                                                                                  | 1                                                                                                                                                                                                                                                                                                                                                                                                                                                                                                                                                                                                                                                                                                                                                                                                                                                                                                                                                                                                                                                                                                                                                                                                                                                                                                                                                                                                                           | Intensive care unit (ICU)        |                                     |     |                 |    |      |   |                           |    |   |   |                                  |    |   |   |                                  |    |   |   |                       |    |   |   |                               |    |   |   |                           |    |   |   |                |    |   |   |                       |
| g.  | 0                                                                                                                                                                                                  | 1                                                                                                                                                                                                                                                                                                                                                                                                                                                                                                                                                                                                                                                                                                                                                                                                                                                                                                                                                                                                                                                                                                                                                                                                                                                                                                                                                                                                                           | Emergency ward                   |                                     |     |                 |    |      |   |                           |    |   |   |                                  |    |   |   |                                  |    |   |   |                       |    |   |   |                               |    |   |   |                           |    |   |   |                |    |   |   |                       |
| h.  | 0                                                                                                                                                                                                  | 1                                                                                                                                                                                                                                                                                                                                                                                                                                                                                                                                                                                                                                                                                                                                                                                                                                                                                                                                                                                                                                                                                                                                                                                                                                                                                                                                                                                                                           | Other ward (specify):            |                                     |     |                 |    |      |   |                           |    |   |   |                                  |    |   |   |                                  |    |   |   |                       |    |   |   |                               |    |   |   |                           |    |   |   |                |    |   |   |                       |
| 204 | <p>In your facility, are post-abortion patients treated as outpatients (i.e., are not admitted, day cases) only, inpatients only (i.e., are admitted, stay overnight), or both?</p>                | <table border="1" style="margin-left: auto; margin-right: auto; border-collapse: collapse;"> <tr> <td style="width: 20px; text-align: center;">1</td> <td>Inpatient only -&gt; <b>GO TO Q207</b></td> </tr> <tr> <td style="text-align: center;">2</td> <td>Outpatient only</td> </tr> <tr> <td style="text-align: center;">3</td> <td>Both</td> </tr> </table>                                                                                                                                                                                                                                                                                                                                                                                                                                                                                                                                                                                                                                                                                                                                                                                                                                                                                                                                                                                                                                                             | 1                                | Inpatient only -> <b>GO TO Q207</b> | 2   | Outpatient only | 3  | Both |   |                           |    |   |   |                                  |    |   |   |                                  |    |   |   |                       |    |   |   |                               |    |   |   |                           |    |   |   |                |    |   |   |                       |
| 1   | Inpatient only -> <b>GO TO Q207</b>                                                                                                                                                                |                                                                                                                                                                                                                                                                                                                                                                                                                                                                                                                                                                                                                                                                                                                                                                                                                                                                                                                                                                                                                                                                                                                                                                                                                                                                                                                                                                                                                             |                                  |                                     |     |                 |    |      |   |                           |    |   |   |                                  |    |   |   |                                  |    |   |   |                       |    |   |   |                               |    |   |   |                           |    |   |   |                |    |   |   |                       |
| 2   | Outpatient only                                                                                                                                                                                    |                                                                                                                                                                                                                                                                                                                                                                                                                                                                                                                                                                                                                                                                                                                                                                                                                                                                                                                                                                                                                                                                                                                                                                                                                                                                                                                                                                                                                             |                                  |                                     |     |                 |    |      |   |                           |    |   |   |                                  |    |   |   |                                  |    |   |   |                       |    |   |   |                               |    |   |   |                           |    |   |   |                |    |   |   |                       |
| 3   | Both                                                                                                                                                                                               |                                                                                                                                                                                                                                                                                                                                                                                                                                                                                                                                                                                                                                                                                                                                                                                                                                                                                                                                                                                                                                                                                                                                                                                                                                                                                                                                                                                                                             |                                  |                                     |     |                 |    |      |   |                           |    |   |   |                                  |    |   |   |                                  |    |   |   |                       |    |   |   |                               |    |   |   |                           |    |   |   |                |    |   |   |                       |

|            |                                                                                                                                                                                                                                                                                                                                                                                                                                                                                                                                                                                                                                                                                                                                                                |                                                                                                                                                                                                                                                                                                                                          |
|------------|----------------------------------------------------------------------------------------------------------------------------------------------------------------------------------------------------------------------------------------------------------------------------------------------------------------------------------------------------------------------------------------------------------------------------------------------------------------------------------------------------------------------------------------------------------------------------------------------------------------------------------------------------------------------------------------------------------------------------------------------------------------|------------------------------------------------------------------------------------------------------------------------------------------------------------------------------------------------------------------------------------------------------------------------------------------------------------------------------------------|
| <p>205</p> | <p>During <b>an average month</b>, about how many post-abortion care patients would you estimate are treated as <b>outpatients</b> in this facility as a whole? Please remember to include all patients treated for abortion complications, whether they are spontaneous or induced.</p> <p><b>[Interviewer : Please probe to elicit a response for an average month; if respondent is <u>not</u> able to provide you with that estimate, then probe for the number of outpatients on average per year. Specify that this is a full calendar year (i.e. from January to December). Please reiterate to the respondent that the number is for spontaneous and induced abortion patients, and should take into consideration all wards of the facility.]</b></p> | <p>a. Number of postabortion care outpatients in an average month <input type="text"/> <input type="text"/> <input type="text"/> <input type="text"/></p> <p><b>OR</b></p> <p>b. Number of postabortion care outpatients in an average year <input type="text"/> <input type="text"/> <input type="text"/> <input type="text"/></p>      |
| <p>206</p> | <p>In <b>the past month</b>, about how many post-abortion care patients were treated as <b>outpatients</b> in this facility as a whole? Please remember to include all patients treated for abortion complications, whether they are due to spontaneous or induced abortions.</p> <p><b>[Interviewer : Please probe to elicit a response for the past month; if respondent is not able to provide you with that estimate, then probe for the number of outpatients during the year 2014. Please reiterate to the respondent that the number should take into consideration all wards of the facility.]</b></p>                                                                                                                                                 | <p>a. Number of postabortion care outpatients in the past month <input type="text"/> <input type="text"/> <input type="text"/> <input type="text"/></p> <p><b>OR</b></p> <p>b. Number of postabortion care outpatients last calendar year (2014) <input type="text"/> <input type="text"/> <input type="text"/> <input type="text"/></p> |

| [Interviewer: See Q. 204. If the Health Facility provides ONLY outpatient services, go to Q. 209.]                                                                                                                                                                                                                                                                                                                                                                                                                                                                                                                                                                                                                                                                                 |                                                                                                                                                                                                                                                                                                                                        |
|------------------------------------------------------------------------------------------------------------------------------------------------------------------------------------------------------------------------------------------------------------------------------------------------------------------------------------------------------------------------------------------------------------------------------------------------------------------------------------------------------------------------------------------------------------------------------------------------------------------------------------------------------------------------------------------------------------------------------------------------------------------------------------|----------------------------------------------------------------------------------------------------------------------------------------------------------------------------------------------------------------------------------------------------------------------------------------------------------------------------------------|
| <p>207</p> <p>During <b>an average month</b>, about how many post-abortion care patients would you estimate were treated as <b>inpatients</b> at this facility as a whole? Please remember to include all patients treated for abortion complications, whether they are due to spontaneous or induced abortions.</p> <p><b>[Interviewer : Please probe to elicit a response for an average month; if respondent is not able to provide you with that estimate, then probe for the number of inpatients on average per year. Specify that this is a full calendar year (i.e. from January to December). Please reiterate to the respondent that the number is for spontaneous and induced abortion patients, and should take into consideration all wards of the facility.]</b></p> | <p>a. Number of postabortion care inpatients in an average month <input type="text"/> <input type="text"/> <input type="text"/> <input type="text"/></p> <p><b>OR</b></p> <p>b. Number of postabortion care inpatients in an average year <input type="text"/> <input type="text"/> <input type="text"/> <input type="text"/></p>      |
| <p>208</p> <p>In the <b>past month</b>, about how many post-abortion care patients were treated as <b>inpatients</b> in this facility as a whole? Please remember to include all patients treated for abortion complications, whether they are due to spontaneous or induced abortions.</p> <p><b>[Interviewer : Please probe to elicit a response for the past month; if respondent is not able to provide you with that estimate, then probe for the number of inpatients during the year 2014. Please reiterate to the respondent that the number should take into consideration all wards of the facility.]</b></p>                                                                                                                                                            | <p>a. Number of postabortion care inpatients in the past month <input type="text"/> <input type="text"/> <input type="text"/> <input type="text"/></p> <p><b>OR</b></p> <p>b. Number of postabortion care inpatients last calendar year (2014) <input type="text"/> <input type="text"/> <input type="text"/> <input type="text"/></p> |

|            |                                                                                                                                                                                                                                                                                                                                                                                                                                                                                                                                                                                                                                                    |                                                                                                                                                                                                                                                                                                                                                                                                                                                                                                                                                                                                                                                                                                                                                                                                                                                                                                                                                                                                                                                                                                                                                                                                                                                                                                                                             |  |  |  |  |  |  |  |  |  |  |  |  |  |  |  |  |
|------------|----------------------------------------------------------------------------------------------------------------------------------------------------------------------------------------------------------------------------------------------------------------------------------------------------------------------------------------------------------------------------------------------------------------------------------------------------------------------------------------------------------------------------------------------------------------------------------------------------------------------------------------------------|---------------------------------------------------------------------------------------------------------------------------------------------------------------------------------------------------------------------------------------------------------------------------------------------------------------------------------------------------------------------------------------------------------------------------------------------------------------------------------------------------------------------------------------------------------------------------------------------------------------------------------------------------------------------------------------------------------------------------------------------------------------------------------------------------------------------------------------------------------------------------------------------------------------------------------------------------------------------------------------------------------------------------------------------------------------------------------------------------------------------------------------------------------------------------------------------------------------------------------------------------------------------------------------------------------------------------------------------|--|--|--|--|--|--|--|--|--|--|--|--|--|--|--|--|
| <p>209</p> | <p><b>[Interviewer : Refer to the previous figures before asking the respondent about the patient totals.]</b></p> <p>Just to confirm what you have just told me, in an <b>average month</b> (or year), your facility treated</p> <p>___ outpatients (Q205)<br/>___ inpatients (Q207).</p> <p><b>[Interviewer: Please read out the total number of spontaneous and induced abortion patients seen at this facility in an average month (Q 205 and Q 207).]</b></p> <p>Is this number correct ?</p> <p><b>[Interviewer: If correct, please insert again at right; if not, then correct Q 205 and Q 207 and insert at right.]</b></p>                | <p>Summary of <b>average</b> per month:</p> <p>a. Outpatients (Q205) <table border="1" style="display: inline-table; vertical-align: middle;"><tr><td style="width: 20px; height: 20px;"></td><td style="width: 20px; height: 20px;"></td><td style="width: 20px; height: 20px;"></td><td style="width: 20px; height: 20px;"></td></tr></table></p> <p>b. Inpatients (Q207) <table border="1" style="display: inline-table; vertical-align: middle;"><tr><td style="width: 20px; height: 20px;"></td><td style="width: 20px; height: 20px;"></td><td style="width: 20px; height: 20px;"></td><td style="width: 20px; height: 20px;"></td></tr></table></p> <p><b>OR</b></p> <p>Summary <b>on average</b> per year:</p> <p>c. Outpatients (Q205) <table border="1" style="display: inline-table; vertical-align: middle;"><tr><td style="width: 20px; height: 20px;"></td><td style="width: 20px; height: 20px;"></td><td style="width: 20px; height: 20px;"></td><td style="width: 20px; height: 20px;"></td></tr></table></p> <p>d. Inpatients (Q207) <table border="1" style="display: inline-table; vertical-align: middle;"><tr><td style="width: 20px; height: 20px;"></td><td style="width: 20px; height: 20px;"></td><td style="width: 20px; height: 20px;"></td><td style="width: 20px; height: 20px;"></td></tr></table></p>       |  |  |  |  |  |  |  |  |  |  |  |  |  |  |  |  |
|            |                                                                                                                                                                                                                                                                                                                                                                                                                                                                                                                                                                                                                                                    |                                                                                                                                                                                                                                                                                                                                                                                                                                                                                                                                                                                                                                                                                                                                                                                                                                                                                                                                                                                                                                                                                                                                                                                                                                                                                                                                             |  |  |  |  |  |  |  |  |  |  |  |  |  |  |  |  |
|            |                                                                                                                                                                                                                                                                                                                                                                                                                                                                                                                                                                                                                                                    |                                                                                                                                                                                                                                                                                                                                                                                                                                                                                                                                                                                                                                                                                                                                                                                                                                                                                                                                                                                                                                                                                                                                                                                                                                                                                                                                             |  |  |  |  |  |  |  |  |  |  |  |  |  |  |  |  |
|            |                                                                                                                                                                                                                                                                                                                                                                                                                                                                                                                                                                                                                                                    |                                                                                                                                                                                                                                                                                                                                                                                                                                                                                                                                                                                                                                                                                                                                                                                                                                                                                                                                                                                                                                                                                                                                                                                                                                                                                                                                             |  |  |  |  |  |  |  |  |  |  |  |  |  |  |  |  |
|            |                                                                                                                                                                                                                                                                                                                                                                                                                                                                                                                                                                                                                                                    |                                                                                                                                                                                                                                                                                                                                                                                                                                                                                                                                                                                                                                                                                                                                                                                                                                                                                                                                                                                                                                                                                                                                                                                                                                                                                                                                             |  |  |  |  |  |  |  |  |  |  |  |  |  |  |  |  |
| <p>210</p> | <p><b>[Interviewer : Refer to the previous figures before asking the respondent about the patient totals.]</b></p> <p>Just to confirm what you have just told me, in the <b>past month</b> (or <b>during the year 2014</b>), your facility treated</p> <p>___ outpatients (Q206) and<br/>___ inpatients (Q208)</p> <p><b>[Interviewer: Please read out the total number of spontaneous and induced abortion patients seen at this facility last month (Q 206 and Q 208).]</b></p> <p>Is this number correct ?</p> <p><b>[Interviewer: If correct, please insert again at right; if not, then correct Q 206 and Q 208 and insert at right.]</b></p> | <p>Summary of number in <b>past month</b>:</p> <p>a. Outpatients (Q206) <table border="1" style="display: inline-table; vertical-align: middle;"><tr><td style="width: 20px; height: 20px;"></td><td style="width: 20px; height: 20px;"></td><td style="width: 20px; height: 20px;"></td><td style="width: 20px; height: 20px;"></td></tr></table></p> <p>b. Inpatients (Q208) <table border="1" style="display: inline-table; vertical-align: middle;"><tr><td style="width: 20px; height: 20px;"></td><td style="width: 20px; height: 20px;"></td><td style="width: 20px; height: 20px;"></td><td style="width: 20px; height: 20px;"></td></tr></table></p> <p><b>OR</b></p> <p>Summary of number in <b>year 2014</b>:</p> <p>c. Outpatients (Q206) <table border="1" style="display: inline-table; vertical-align: middle;"><tr><td style="width: 20px; height: 20px;"></td><td style="width: 20px; height: 20px;"></td><td style="width: 20px; height: 20px;"></td><td style="width: 20px; height: 20px;"></td></tr></table></p> <p>d. Inpatients (Q208) <table border="1" style="display: inline-table; vertical-align: middle;"><tr><td style="width: 20px; height: 20px;"></td><td style="width: 20px; height: 20px;"></td><td style="width: 20px; height: 20px;"></td><td style="width: 20px; height: 20px;"></td></tr></table></p> |  |  |  |  |  |  |  |  |  |  |  |  |  |  |  |  |
|            |                                                                                                                                                                                                                                                                                                                                                                                                                                                                                                                                                                                                                                                    |                                                                                                                                                                                                                                                                                                                                                                                                                                                                                                                                                                                                                                                                                                                                                                                                                                                                                                                                                                                                                                                                                                                                                                                                                                                                                                                                             |  |  |  |  |  |  |  |  |  |  |  |  |  |  |  |  |
|            |                                                                                                                                                                                                                                                                                                                                                                                                                                                                                                                                                                                                                                                    |                                                                                                                                                                                                                                                                                                                                                                                                                                                                                                                                                                                                                                                                                                                                                                                                                                                                                                                                                                                                                                                                                                                                                                                                                                                                                                                                             |  |  |  |  |  |  |  |  |  |  |  |  |  |  |  |  |
|            |                                                                                                                                                                                                                                                                                                                                                                                                                                                                                                                                                                                                                                                    |                                                                                                                                                                                                                                                                                                                                                                                                                                                                                                                                                                                                                                                                                                                                                                                                                                                                                                                                                                                                                                                                                                                                                                                                                                                                                                                                             |  |  |  |  |  |  |  |  |  |  |  |  |  |  |  |  |
|            |                                                                                                                                                                                                                                                                                                                                                                                                                                                                                                                                                                                                                                                    |                                                                                                                                                                                                                                                                                                                                                                                                                                                                                                                                                                                                                                                                                                                                                                                                                                                                                                                                                                                                                                                                                                                                                                                                                                                                                                                                             |  |  |  |  |  |  |  |  |  |  |  |  |  |  |  |  |

|             |                                                                                                                                                                                                                                                                                                                                                                                                         |                                                                                                                                                                                                                                                                                                                                                                                                                                                                                                                                                                                         |                                                                                                                                                                                                                                                                                                                         |                                                                                              |   |                    |                                                                                                                                                                                                   |                            |   |                                            |                 |                                               |   |                     |   |                              |   |                                          |   |                       |       |  |       |                                                                                                                                                                                                                                                                                                                                          |          |  |  |  |  |  |  |  |  |  |  |             |
|-------------|---------------------------------------------------------------------------------------------------------------------------------------------------------------------------------------------------------------------------------------------------------------------------------------------------------------------------------------------------------------------------------------------------------|-----------------------------------------------------------------------------------------------------------------------------------------------------------------------------------------------------------------------------------------------------------------------------------------------------------------------------------------------------------------------------------------------------------------------------------------------------------------------------------------------------------------------------------------------------------------------------------------|-------------------------------------------------------------------------------------------------------------------------------------------------------------------------------------------------------------------------------------------------------------------------------------------------------------------------|----------------------------------------------------------------------------------------------|---|--------------------|---------------------------------------------------------------------------------------------------------------------------------------------------------------------------------------------------|----------------------------|---|--------------------------------------------|-----------------|-----------------------------------------------|---|---------------------|---|------------------------------|---|------------------------------------------|---|-----------------------|-------|--|-------|------------------------------------------------------------------------------------------------------------------------------------------------------------------------------------------------------------------------------------------------------------------------------------------------------------------------------------------|----------|--|--|--|--|--|--|--|--|--|--|-------------|
| 211         | <p>Thinking about patients you have treated at your facility in the past 1 year (12 months), what percentage of the post-abortion patients at this facility had the following complications?</p> <p><b>[Interviewer: Read each complication aloud. The percentages must add up to at least 100%. They may add up to more than 100% since a patient may suffer from more than one complication.]</b></p> | <table border="1"> <tr><td>A</td><td>Hemorrhagic shock</td></tr> <tr><td>B</td><td>Septic shock</td></tr> <tr><td>C</td><td>Sepsis</td></tr> <tr><td>D</td><td>Uterine perforation</td></tr> <tr><td>E</td><td>Hemorrhage</td></tr> <tr><td>F</td><td>Incomplete abortion</td></tr> <tr><td>G</td><td>Cervical/vaginal lacerations</td></tr> <tr><td>H</td><td>Visceral injury (ie. bladder, intestine)</td></tr> <tr><td rowspan="2">X</td><td>Other (specify):</td></tr> <tr><td>_____</td></tr> <tr><td></td><td>_____</td></tr> </table>                                            | A                                                                                                                                                                                                                                                                                                                       | Hemorrhagic shock                                                                            | B | Septic shock       | C                                                                                                                                                                                                 | Sepsis                     | D | Uterine perforation                        | E               | Hemorrhage                                    | F | Incomplete abortion | G | Cervical/vaginal lacerations | H | Visceral injury (ie. bladder, intestine) | X | Other (specify):      | _____ |  | _____ | <table border="1"> <tr><td style="text-align: right;"><b>%</b></td></tr> <tr><td></td></tr> <tr><td style="text-align: right;"><b>100+</b></td></tr> </table> | <b>%</b> |  |  |  |  |  |  |  |  |  |  | <b>100+</b> |
| A           | Hemorrhagic shock                                                                                                                                                                                                                                                                                                                                                                                       |                                                                                                                                                                                                                                                                                                                                                                                                                                                                                                                                                                                         |                                                                                                                                                                                                                                                                                                                         |                                                                                              |   |                    |                                                                                                                                                                                                   |                            |   |                                            |                 |                                               |   |                     |   |                              |   |                                          |   |                       |       |  |       |                                                                                                                                                                                                                                                                                                                                          |          |  |  |  |  |  |  |  |  |  |  |             |
| B           | Septic shock                                                                                                                                                                                                                                                                                                                                                                                            |                                                                                                                                                                                                                                                                                                                                                                                                                                                                                                                                                                                         |                                                                                                                                                                                                                                                                                                                         |                                                                                              |   |                    |                                                                                                                                                                                                   |                            |   |                                            |                 |                                               |   |                     |   |                              |   |                                          |   |                       |       |  |       |                                                                                                                                                                                                                                                                                                                                          |          |  |  |  |  |  |  |  |  |  |  |             |
| C           | Sepsis                                                                                                                                                                                                                                                                                                                                                                                                  |                                                                                                                                                                                                                                                                                                                                                                                                                                                                                                                                                                                         |                                                                                                                                                                                                                                                                                                                         |                                                                                              |   |                    |                                                                                                                                                                                                   |                            |   |                                            |                 |                                               |   |                     |   |                              |   |                                          |   |                       |       |  |       |                                                                                                                                                                                                                                                                                                                                          |          |  |  |  |  |  |  |  |  |  |  |             |
| D           | Uterine perforation                                                                                                                                                                                                                                                                                                                                                                                     |                                                                                                                                                                                                                                                                                                                                                                                                                                                                                                                                                                                         |                                                                                                                                                                                                                                                                                                                         |                                                                                              |   |                    |                                                                                                                                                                                                   |                            |   |                                            |                 |                                               |   |                     |   |                              |   |                                          |   |                       |       |  |       |                                                                                                                                                                                                                                                                                                                                          |          |  |  |  |  |  |  |  |  |  |  |             |
| E           | Hemorrhage                                                                                                                                                                                                                                                                                                                                                                                              |                                                                                                                                                                                                                                                                                                                                                                                                                                                                                                                                                                                         |                                                                                                                                                                                                                                                                                                                         |                                                                                              |   |                    |                                                                                                                                                                                                   |                            |   |                                            |                 |                                               |   |                     |   |                              |   |                                          |   |                       |       |  |       |                                                                                                                                                                                                                                                                                                                                          |          |  |  |  |  |  |  |  |  |  |  |             |
| F           | Incomplete abortion                                                                                                                                                                                                                                                                                                                                                                                     |                                                                                                                                                                                                                                                                                                                                                                                                                                                                                                                                                                                         |                                                                                                                                                                                                                                                                                                                         |                                                                                              |   |                    |                                                                                                                                                                                                   |                            |   |                                            |                 |                                               |   |                     |   |                              |   |                                          |   |                       |       |  |       |                                                                                                                                                                                                                                                                                                                                          |          |  |  |  |  |  |  |  |  |  |  |             |
| G           | Cervical/vaginal lacerations                                                                                                                                                                                                                                                                                                                                                                            |                                                                                                                                                                                                                                                                                                                                                                                                                                                                                                                                                                                         |                                                                                                                                                                                                                                                                                                                         |                                                                                              |   |                    |                                                                                                                                                                                                   |                            |   |                                            |                 |                                               |   |                     |   |                              |   |                                          |   |                       |       |  |       |                                                                                                                                                                                                                                                                                                                                          |          |  |  |  |  |  |  |  |  |  |  |             |
| H           | Visceral injury (ie. bladder, intestine)                                                                                                                                                                                                                                                                                                                                                                |                                                                                                                                                                                                                                                                                                                                                                                                                                                                                                                                                                                         |                                                                                                                                                                                                                                                                                                                         |                                                                                              |   |                    |                                                                                                                                                                                                   |                            |   |                                            |                 |                                               |   |                     |   |                              |   |                                          |   |                       |       |  |       |                                                                                                                                                                                                                                                                                                                                          |          |  |  |  |  |  |  |  |  |  |  |             |
| X           | Other (specify):                                                                                                                                                                                                                                                                                                                                                                                        |                                                                                                                                                                                                                                                                                                                                                                                                                                                                                                                                                                                         |                                                                                                                                                                                                                                                                                                                         |                                                                                              |   |                    |                                                                                                                                                                                                   |                            |   |                                            |                 |                                               |   |                     |   |                              |   |                                          |   |                       |       |  |       |                                                                                                                                                                                                                                                                                                                                          |          |  |  |  |  |  |  |  |  |  |  |             |
|             | _____                                                                                                                                                                                                                                                                                                                                                                                                   |                                                                                                                                                                                                                                                                                                                                                                                                                                                                                                                                                                                         |                                                                                                                                                                                                                                                                                                                         |                                                                                              |   |                    |                                                                                                                                                                                                   |                            |   |                                            |                 |                                               |   |                     |   |                              |   |                                          |   |                       |       |  |       |                                                                                                                                                                                                                                                                                                                                          |          |  |  |  |  |  |  |  |  |  |  |             |
|             | _____                                                                                                                                                                                                                                                                                                                                                                                                   |                                                                                                                                                                                                                                                                                                                                                                                                                                                                                                                                                                                         |                                                                                                                                                                                                                                                                                                                         |                                                                                              |   |                    |                                                                                                                                                                                                   |                            |   |                                            |                 |                                               |   |                     |   |                              |   |                                          |   |                       |       |  |       |                                                                                                                                                                                                                                                                                                                                          |          |  |  |  |  |  |  |  |  |  |  |             |
| <b>%</b>    |                                                                                                                                                                                                                                                                                                                                                                                                         |                                                                                                                                                                                                                                                                                                                                                                                                                                                                                                                                                                                         |                                                                                                                                                                                                                                                                                                                         |                                                                                              |   |                    |                                                                                                                                                                                                   |                            |   |                                            |                 |                                               |   |                     |   |                              |   |                                          |   |                       |       |  |       |                                                                                                                                                                                                                                                                                                                                          |          |  |  |  |  |  |  |  |  |  |  |             |
|             |                                                                                                                                                                                                                                                                                                                                                                                                         |                                                                                                                                                                                                                                                                                                                                                                                                                                                                                                                                                                                         |                                                                                                                                                                                                                                                                                                                         |                                                                                              |   |                    |                                                                                                                                                                                                   |                            |   |                                            |                 |                                               |   |                     |   |                              |   |                                          |   |                       |       |  |       |                                                                                                                                                                                                                                                                                                                                          |          |  |  |  |  |  |  |  |  |  |  |             |
|             |                                                                                                                                                                                                                                                                                                                                                                                                         |                                                                                                                                                                                                                                                                                                                                                                                                                                                                                                                                                                                         |                                                                                                                                                                                                                                                                                                                         |                                                                                              |   |                    |                                                                                                                                                                                                   |                            |   |                                            |                 |                                               |   |                     |   |                              |   |                                          |   |                       |       |  |       |                                                                                                                                                                                                                                                                                                                                          |          |  |  |  |  |  |  |  |  |  |  |             |
|             |                                                                                                                                                                                                                                                                                                                                                                                                         |                                                                                                                                                                                                                                                                                                                                                                                                                                                                                                                                                                                         |                                                                                                                                                                                                                                                                                                                         |                                                                                              |   |                    |                                                                                                                                                                                                   |                            |   |                                            |                 |                                               |   |                     |   |                              |   |                                          |   |                       |       |  |       |                                                                                                                                                                                                                                                                                                                                          |          |  |  |  |  |  |  |  |  |  |  |             |
|             |                                                                                                                                                                                                                                                                                                                                                                                                         |                                                                                                                                                                                                                                                                                                                                                                                                                                                                                                                                                                                         |                                                                                                                                                                                                                                                                                                                         |                                                                                              |   |                    |                                                                                                                                                                                                   |                            |   |                                            |                 |                                               |   |                     |   |                              |   |                                          |   |                       |       |  |       |                                                                                                                                                                                                                                                                                                                                          |          |  |  |  |  |  |  |  |  |  |  |             |
|             |                                                                                                                                                                                                                                                                                                                                                                                                         |                                                                                                                                                                                                                                                                                                                                                                                                                                                                                                                                                                                         |                                                                                                                                                                                                                                                                                                                         |                                                                                              |   |                    |                                                                                                                                                                                                   |                            |   |                                            |                 |                                               |   |                     |   |                              |   |                                          |   |                       |       |  |       |                                                                                                                                                                                                                                                                                                                                          |          |  |  |  |  |  |  |  |  |  |  |             |
|             |                                                                                                                                                                                                                                                                                                                                                                                                         |                                                                                                                                                                                                                                                                                                                                                                                                                                                                                                                                                                                         |                                                                                                                                                                                                                                                                                                                         |                                                                                              |   |                    |                                                                                                                                                                                                   |                            |   |                                            |                 |                                               |   |                     |   |                              |   |                                          |   |                       |       |  |       |                                                                                                                                                                                                                                                                                                                                          |          |  |  |  |  |  |  |  |  |  |  |             |
|             |                                                                                                                                                                                                                                                                                                                                                                                                         |                                                                                                                                                                                                                                                                                                                                                                                                                                                                                                                                                                                         |                                                                                                                                                                                                                                                                                                                         |                                                                                              |   |                    |                                                                                                                                                                                                   |                            |   |                                            |                 |                                               |   |                     |   |                              |   |                                          |   |                       |       |  |       |                                                                                                                                                                                                                                                                                                                                          |          |  |  |  |  |  |  |  |  |  |  |             |
|             |                                                                                                                                                                                                                                                                                                                                                                                                         |                                                                                                                                                                                                                                                                                                                                                                                                                                                                                                                                                                                         |                                                                                                                                                                                                                                                                                                                         |                                                                                              |   |                    |                                                                                                                                                                                                   |                            |   |                                            |                 |                                               |   |                     |   |                              |   |                                          |   |                       |       |  |       |                                                                                                                                                                                                                                                                                                                                          |          |  |  |  |  |  |  |  |  |  |  |             |
|             |                                                                                                                                                                                                                                                                                                                                                                                                         |                                                                                                                                                                                                                                                                                                                                                                                                                                                                                                                                                                                         |                                                                                                                                                                                                                                                                                                                         |                                                                                              |   |                    |                                                                                                                                                                                                   |                            |   |                                            |                 |                                               |   |                     |   |                              |   |                                          |   |                       |       |  |       |                                                                                                                                                                                                                                                                                                                                          |          |  |  |  |  |  |  |  |  |  |  |             |
|             |                                                                                                                                                                                                                                                                                                                                                                                                         |                                                                                                                                                                                                                                                                                                                                                                                                                                                                                                                                                                                         |                                                                                                                                                                                                                                                                                                                         |                                                                                              |   |                    |                                                                                                                                                                                                   |                            |   |                                            |                 |                                               |   |                     |   |                              |   |                                          |   |                       |       |  |       |                                                                                                                                                                                                                                                                                                                                          |          |  |  |  |  |  |  |  |  |  |  |             |
| <b>100+</b> |                                                                                                                                                                                                                                                                                                                                                                                                         |                                                                                                                                                                                                                                                                                                                                                                                                                                                                                                                                                                                         |                                                                                                                                                                                                                                                                                                                         |                                                                                              |   |                    |                                                                                                                                                                                                   |                            |   |                                            |                 |                                               |   |                     |   |                              |   |                                          |   |                       |       |  |       |                                                                                                                                                                                                                                                                                                                                          |          |  |  |  |  |  |  |  |  |  |  |             |
| 212         | <p>a. Last year (2014), did any woman die in your facility from any of these abortion-related complications?</p> <p>b. If yes, please estimate how many died?</p>                                                                                                                                                                                                                                       | <table border="1"> <tr><td>0</td><td>No</td></tr> <tr><td>1</td><td>Yes</td></tr> </table>                                                                                                                                                                                                                                                                                                                                                                                                                                                                                              | 0                                                                                                                                                                                                                                                                                                                       | No                                                                                           | 1 | Yes                | <table border="1"> <tr><td style="width: 30px; height: 20px;"></td><td style="width: 30px; height: 20px;"></td><td style="width: 30px; height: 20px;"></td><td>number who died</td></tr> </table> |                            |   |                                            | number who died |                                               |   |                     |   |                              |   |                                          |   |                       |       |  |       |                                                                                                                                                                                                                                                                                                                                          |          |  |  |  |  |  |  |  |  |  |  |             |
| 0           | No                                                                                                                                                                                                                                                                                                                                                                                                      |                                                                                                                                                                                                                                                                                                                                                                                                                                                                                                                                                                                         |                                                                                                                                                                                                                                                                                                                         |                                                                                              |   |                    |                                                                                                                                                                                                   |                            |   |                                            |                 |                                               |   |                     |   |                              |   |                                          |   |                       |       |  |       |                                                                                                                                                                                                                                                                                                                                          |          |  |  |  |  |  |  |  |  |  |  |             |
| 1           | Yes                                                                                                                                                                                                                                                                                                                                                                                                     |                                                                                                                                                                                                                                                                                                                                                                                                                                                                                                                                                                                         |                                                                                                                                                                                                                                                                                                                         |                                                                                              |   |                    |                                                                                                                                                                                                   |                            |   |                                            |                 |                                               |   |                     |   |                              |   |                                          |   |                       |       |  |       |                                                                                                                                                                                                                                                                                                                                          |          |  |  |  |  |  |  |  |  |  |  |             |
|             |                                                                                                                                                                                                                                                                                                                                                                                                         |                                                                                                                                                                                                                                                                                                                                                                                                                                                                                                                                                                                         | number who died                                                                                                                                                                                                                                                                                                         |                                                                                              |   |                    |                                                                                                                                                                                                   |                            |   |                                            |                 |                                               |   |                     |   |                              |   |                                          |   |                       |       |  |       |                                                                                                                                                                                                                                                                                                                                          |          |  |  |  |  |  |  |  |  |  |  |             |
| 213         | <p>Out of all the patients you treated in the <b>past month</b>, how many were referred to your facility <i>after having been treated</i> at a lower level facility?</p> <p>(ONLY if they don't know/can't estimate for past month:) Or in the year 2014?</p> <p><b>[NOTE: If 0, circle "Y" in Q214, then skip to Q215.]</b></p>                                                                        | <p>Total number of postabortion care patients received from another health facility in the <b>past month</b></p> <p><b>OR</b></p> <p>Total number of postabortion care patients received from another health facility <b>in the year 2014</b></p>                                                                                                                                                                                                                                                                                                                                       | <table border="1"> <tr><td style="width: 30px; height: 20px;"></td><td style="width: 30px; height: 20px;"></td><td style="width: 30px; height: 20px;"></td></tr> <tr><td style="width: 30px; height: 20px;"></td><td style="width: 30px; height: 20px;"></td><td style="width: 30px; height: 20px;"></td></tr> </table> |                                                                                              |   |                    |                                                                                                                                                                                                   |                            |   |                                            |                 |                                               |   |                     |   |                              |   |                                          |   |                       |       |  |       |                                                                                                                                                                                                                                                                                                                                          |          |  |  |  |  |  |  |  |  |  |  |             |
|             |                                                                                                                                                                                                                                                                                                                                                                                                         |                                                                                                                                                                                                                                                                                                                                                                                                                                                                                                                                                                                         |                                                                                                                                                                                                                                                                                                                         |                                                                                              |   |                    |                                                                                                                                                                                                   |                            |   |                                            |                 |                                               |   |                     |   |                              |   |                                          |   |                       |       |  |       |                                                                                                                                                                                                                                                                                                                                          |          |  |  |  |  |  |  |  |  |  |  |             |
|             |                                                                                                                                                                                                                                                                                                                                                                                                         |                                                                                                                                                                                                                                                                                                                                                                                                                                                                                                                                                                                         |                                                                                                                                                                                                                                                                                                                         |                                                                                              |   |                    |                                                                                                                                                                                                   |                            |   |                                            |                 |                                               |   |                     |   |                              |   |                                          |   |                       |       |  |       |                                                                                                                                                                                                                                                                                                                                          |          |  |  |  |  |  |  |  |  |  |  |             |
| 214         | <p>What reasons were given by the escorts or in the referral records of patients referred to you for postabortion care?</p> <p><b>[Interviewer: Do not prompt. Circle all that apply.]</b></p>                                                                                                                                                                                                          | <table border="1"> <tr><td>A</td><td>Medical reasons (fever, lower abdominal pain, hemorrhage (or anemia), perforation of uterus)</td></tr> <tr><td>B</td><td>Comprehensive care</td></tr> <tr><td>C</td><td>Need for blood transfusion</td></tr> <tr><td>D</td><td>Lack of equipment, drugs, consumables, etc</td></tr> <tr><td>E</td><td>Lack of qualified personnel/medical expertise</td></tr> <tr><td>F</td><td>Family planning</td></tr> <tr><td>X</td><td>Other (specify):</td></tr> <tr><td></td><td>_____</td></tr> <tr><td>Y</td><td>Received no referrals</td></tr> </table> | A                                                                                                                                                                                                                                                                                                                       | Medical reasons (fever, lower abdominal pain, hemorrhage (or anemia), perforation of uterus) | B | Comprehensive care | C                                                                                                                                                                                                 | Need for blood transfusion | D | Lack of equipment, drugs, consumables, etc | E               | Lack of qualified personnel/medical expertise | F | Family planning     | X | Other (specify):             |   | _____                                    | Y | Received no referrals |       |  |       |                                                                                                                                                                                                                                                                                                                                          |          |  |  |  |  |  |  |  |  |  |  |             |
| A           | Medical reasons (fever, lower abdominal pain, hemorrhage (or anemia), perforation of uterus)                                                                                                                                                                                                                                                                                                            |                                                                                                                                                                                                                                                                                                                                                                                                                                                                                                                                                                                         |                                                                                                                                                                                                                                                                                                                         |                                                                                              |   |                    |                                                                                                                                                                                                   |                            |   |                                            |                 |                                               |   |                     |   |                              |   |                                          |   |                       |       |  |       |                                                                                                                                                                                                                                                                                                                                          |          |  |  |  |  |  |  |  |  |  |  |             |
| B           | Comprehensive care                                                                                                                                                                                                                                                                                                                                                                                      |                                                                                                                                                                                                                                                                                                                                                                                                                                                                                                                                                                                         |                                                                                                                                                                                                                                                                                                                         |                                                                                              |   |                    |                                                                                                                                                                                                   |                            |   |                                            |                 |                                               |   |                     |   |                              |   |                                          |   |                       |       |  |       |                                                                                                                                                                                                                                                                                                                                          |          |  |  |  |  |  |  |  |  |  |  |             |
| C           | Need for blood transfusion                                                                                                                                                                                                                                                                                                                                                                              |                                                                                                                                                                                                                                                                                                                                                                                                                                                                                                                                                                                         |                                                                                                                                                                                                                                                                                                                         |                                                                                              |   |                    |                                                                                                                                                                                                   |                            |   |                                            |                 |                                               |   |                     |   |                              |   |                                          |   |                       |       |  |       |                                                                                                                                                                                                                                                                                                                                          |          |  |  |  |  |  |  |  |  |  |  |             |
| D           | Lack of equipment, drugs, consumables, etc                                                                                                                                                                                                                                                                                                                                                              |                                                                                                                                                                                                                                                                                                                                                                                                                                                                                                                                                                                         |                                                                                                                                                                                                                                                                                                                         |                                                                                              |   |                    |                                                                                                                                                                                                   |                            |   |                                            |                 |                                               |   |                     |   |                              |   |                                          |   |                       |       |  |       |                                                                                                                                                                                                                                                                                                                                          |          |  |  |  |  |  |  |  |  |  |  |             |
| E           | Lack of qualified personnel/medical expertise                                                                                                                                                                                                                                                                                                                                                           |                                                                                                                                                                                                                                                                                                                                                                                                                                                                                                                                                                                         |                                                                                                                                                                                                                                                                                                                         |                                                                                              |   |                    |                                                                                                                                                                                                   |                            |   |                                            |                 |                                               |   |                     |   |                              |   |                                          |   |                       |       |  |       |                                                                                                                                                                                                                                                                                                                                          |          |  |  |  |  |  |  |  |  |  |  |             |
| F           | Family planning                                                                                                                                                                                                                                                                                                                                                                                         |                                                                                                                                                                                                                                                                                                                                                                                                                                                                                                                                                                                         |                                                                                                                                                                                                                                                                                                                         |                                                                                              |   |                    |                                                                                                                                                                                                   |                            |   |                                            |                 |                                               |   |                     |   |                              |   |                                          |   |                       |       |  |       |                                                                                                                                                                                                                                                                                                                                          |          |  |  |  |  |  |  |  |  |  |  |             |
| X           | Other (specify):                                                                                                                                                                                                                                                                                                                                                                                        |                                                                                                                                                                                                                                                                                                                                                                                                                                                                                                                                                                                         |                                                                                                                                                                                                                                                                                                                         |                                                                                              |   |                    |                                                                                                                                                                                                   |                            |   |                                            |                 |                                               |   |                     |   |                              |   |                                          |   |                       |       |  |       |                                                                                                                                                                                                                                                                                                                                          |          |  |  |  |  |  |  |  |  |  |  |             |
|             | _____                                                                                                                                                                                                                                                                                                                                                                                                   |                                                                                                                                                                                                                                                                                                                                                                                                                                                                                                                                                                                         |                                                                                                                                                                                                                                                                                                                         |                                                                                              |   |                    |                                                                                                                                                                                                   |                            |   |                                            |                 |                                               |   |                     |   |                              |   |                                          |   |                       |       |  |       |                                                                                                                                                                                                                                                                                                                                          |          |  |  |  |  |  |  |  |  |  |  |             |
| Y           | Received no referrals                                                                                                                                                                                                                                                                                                                                                                                   |                                                                                                                                                                                                                                                                                                                                                                                                                                                                                                                                                                                         |                                                                                                                                                                                                                                                                                                                         |                                                                                              |   |                    |                                                                                                                                                                                                   |                            |   |                                            |                 |                                               |   |                     |   |                              |   |                                          |   |                       |       |  |       |                                                                                                                                                                                                                                                                                                                                          |          |  |  |  |  |  |  |  |  |  |  |             |

|     |                                                                                                                                                                                                                                                                                                                                                                                                                                                                                                      |                                                                                                                                                                                                                                                                                                                       |                                                                                                                                                                                                                                                                                                                                                                                                      |
|-----|------------------------------------------------------------------------------------------------------------------------------------------------------------------------------------------------------------------------------------------------------------------------------------------------------------------------------------------------------------------------------------------------------------------------------------------------------------------------------------------------------|-----------------------------------------------------------------------------------------------------------------------------------------------------------------------------------------------------------------------------------------------------------------------------------------------------------------------|------------------------------------------------------------------------------------------------------------------------------------------------------------------------------------------------------------------------------------------------------------------------------------------------------------------------------------------------------------------------------------------------------|
| 215 | <p>Out of all the post-abortion care patients treated at your facility in the <b>past month</b>, how many have you referred to another level facility for adequate coverage, <b>after</b> having treated them for postabortion care (either as inpatients or outpatients)?</p> <p><b>(ONLY if they don't know/can't estimate for past month, or if they say there were no referrals in the past month:)</b> Or in the year 2014?</p> <p><b>Note:</b> If 0, circle "Y" in 216, then skip to Q217.</p> | <p>a. Total number of patients referred for postabortion care in the past month <input type="text"/> <input type="text"/> <input type="text"/></p> <p><b>OR</b></p> <p>b. Total number of patients referred for postabortion care in the year 2014 <input type="text"/> <input type="text"/> <input type="text"/></p> |                                                                                                                                                                                                                                                                                                                                                                                                      |
| 216 | <p>What are the medical reasons (indications) for transferring a postabortion care case to a higher level facility?</p> <p><b>[Interviewer: Do not prompt. Circle all that apply.]</b></p>                                                                                                                                                                                                                                                                                                           | <p>A</p> <p>B</p> <p>C</p> <p>D</p> <p>E</p> <p>F</p> <p>X</p> <p>Y</p>                                                                                                                                                                                                                                               | <p>Medical reasons (fever, lower abdominal pain, hemorrhage (or anemia), perforation of uterus)</p> <p>Comprehensive care</p> <p>Need for blood transfusion</p> <p>Lack of equipment, drugs, consumables, etc</p> <p>Lack of qualified personnel/medical expertise</p> <p>Family planning</p> <p>Other (specify):</p> <p>Does not apply (don't refer patients)</p>                                   |
| 217 | <p>What are the various procedures and measures used to treat abortion-complication patients at this facility?</p> <p><b>[Interviewer: Do not prompt. Circle all that apply.]</b></p>                                                                                                                                                                                                                                                                                                                | <p>A</p> <p>B</p> <p>C</p> <p>D</p> <p>E</p> <p>F</p> <p>G</p> <p>H</p> <p>I</p> <p>X</p>                                                                                                                                                                                                                             | <p>Evacuation with a sharp curette (D&amp;E, D&amp;C)</p> <p>MVA (manual vacuum aspiration)</p> <p>Electric vacuum aspiration</p> <p>Surgery (e.g. laparotomy, repair injured viscera, hysterectomy)</p> <p>Misoprostol</p> <p>Blood transfusion</p> <p>Antibiotics</p> <p>Injectable uterotonic (e.g. Oxytocin, ergometrine)</p> <p>IV fluids</p> <p>Other (specify):</p> <p>_____</p> <p>_____</p> |

|     |                                                                                                                                                                                                                                                                                                                                                                                                                                                                                                                                                                                                                                                 |                                                                                  |                                            |                                           |
|-----|-------------------------------------------------------------------------------------------------------------------------------------------------------------------------------------------------------------------------------------------------------------------------------------------------------------------------------------------------------------------------------------------------------------------------------------------------------------------------------------------------------------------------------------------------------------------------------------------------------------------------------------------------|----------------------------------------------------------------------------------|--------------------------------------------|-------------------------------------------|
| 218 | <p>In this facility, what percentage of postabortion care patients are treated by the following procedures?</p> <p><b>[Interviewer: If the respondent has trouble with 100%, you can ask "How many out of 10" instead, as long as you convert to percentages by multiplying each response by 10.]</b></p> <p><b>[Interviewer: Read each procedure to the respondent. After you have completed the list, make sure all numbers add up to at least 100. There can be 0% for certain procedures, but there must be a number in each box. It is OK if the sum is more than 100 because some patients might receive more than 1 procedure. ]</b></p> |                                                                                  |                                            | <b>%</b>                                  |
|     |                                                                                                                                                                                                                                                                                                                                                                                                                                                                                                                                                                                                                                                 | A                                                                                | Evacuation with a sharp curette (D&E, D&C) |                                           |
|     |                                                                                                                                                                                                                                                                                                                                                                                                                                                                                                                                                                                                                                                 | B                                                                                | MVA (manual vacuum aspiration)             |                                           |
|     |                                                                                                                                                                                                                                                                                                                                                                                                                                                                                                                                                                                                                                                 | C                                                                                | Electric vacuum aspiration                 |                                           |
|     |                                                                                                                                                                                                                                                                                                                                                                                                                                                                                                                                                                                                                                                 | D                                                                                | Surgery only (e.g. laparotomy)             |                                           |
|     |                                                                                                                                                                                                                                                                                                                                                                                                                                                                                                                                                                                                                                                 | E                                                                                | Misoprostol                                |                                           |
|     |                                                                                                                                                                                                                                                                                                                                                                                                                                                                                                                                                                                                                                                 | X                                                                                | Other (specify):                           |                                           |
|     |                                                                                                                                                                                                                                                                                                                                                                                                                                                                                                                                                                                                                                                 |                                                                                  |                                            | <b>100+</b>                               |
| 219 | Out of every 10 women treated in this facility for abortion complications, how many, in your opinion, had a spontaneous abortion or miscarriage?                                                                                                                                                                                                                                                                                                                                                                                                                                                                                                | Number of spontaneous abortions out of every 10 PAC (postabortion care) cases    |                                            | <input type="text"/> <input type="text"/> |
| 220 | Out of every 10 women treated in this facility for abortion complications, how many, according to your best estimate, were in the first trimester of pregnancy?                                                                                                                                                                                                                                                                                                                                                                                                                                                                                 | Number of 1st trimester pregnancy losses out of every 10 PAC (postabortion care) |                                            | <input type="text"/> <input type="text"/> |
| 221 | Does this facility currently possess functional manual vacuum aspiration (MVA) kits?                                                                                                                                                                                                                                                                                                                                                                                                                                                                                                                                                            | 0                                                                                | No                                         |                                           |
|     |                                                                                                                                                                                                                                                                                                                                                                                                                                                                                                                                                                                                                                                 | 1                                                                                | Yes                                        |                                           |

| <b>Module 3: General</b>                                         |                                                                                                                                                                                                                                                              |                                                                                        |
|------------------------------------------------------------------|--------------------------------------------------------------------------------------------------------------------------------------------------------------------------------------------------------------------------------------------------------------|----------------------------------------------------------------------------------------|
| 301                                                              | Do you consider treatment of abortion complications to be a burden for your facility?<br><br><b>If yes, ask: "In what respect does treatment of abortion complications pose a burden for your facility?"</b><br><b>[Do not read. Circle all that apply.]</b> |                                                                                        |
|                                                                  |                                                                                                                                                                                                                                                              | 0 No <b>[Go to 302]</b>                                                                |
|                                                                  |                                                                                                                                                                                                                                                              | 1 Yes                                                                                  |
|                                                                  |                                                                                                                                                                                                                                                              |                                                                                        |
|                                                                  |                                                                                                                                                                                                                                                              | A Too many patients                                                                    |
|                                                                  |                                                                                                                                                                                                                                                              | B Lack of equipment/ supplies                                                          |
|                                                                  |                                                                                                                                                                                                                                                              | C It is morally unacceptable because of religious considerations                       |
|                                                                  |                                                                                                                                                                                                                                                              | D Lack of staff/ qualified personnel                                                   |
| E Facility does not have adequate space (e.g. theatre too small) |                                                                                                                                                                                                                                                              |                                                                                        |
| X Other (specify):<br>_____                                      |                                                                                                                                                                                                                                                              |                                                                                        |
| 302                                                              | In your opinion, how could treatment for abortion complications be improved at this facility?<br><br><b>[Do not read]</b><br><b>Circle all that apply.</b>                                                                                                   | A Have a private room for postabortion care patients                                   |
|                                                                  |                                                                                                                                                                                                                                                              | B Improve/expand infrastructure                                                        |
|                                                                  |                                                                                                                                                                                                                                                              | C Have more trained people available                                                   |
|                                                                  |                                                                                                                                                                                                                                                              | D Have more lower level facilities equipped to provide PAC (postabortion care).        |
|                                                                  |                                                                                                                                                                                                                                                              | E Have more commodities available (MVA equipment, antibiotics, blood, pain medication) |
|                                                                  |                                                                                                                                                                                                                                                              | F Provide information on contraception and give methods                                |
|                                                                  |                                                                                                                                                                                                                                                              | G Provide protocols for caring for postabortion patients                               |
|                                                                  |                                                                                                                                                                                                                                                              | H Provide more incentives to staff (e.g. financial, refresher courses, material)       |
|                                                                  |                                                                                                                                                                                                                                                              | I Nothing is needed, current treatment is adequate                                     |
|                                                                  |                                                                                                                                                                                                                                                              | X Other (specify):<br>_____                                                            |
| 303                                                              | Currently in Malawi, the law only allows abortion to save a woman's life. Do you think the abortion laws in Malawi should be changed?                                                                                                                        |                                                                                        |
|                                                                  |                                                                                                                                                                                                                                                              | 0 No                                                                                   |
|                                                                  |                                                                                                                                                                                                                                                              | 1 Yes                                                                                  |
|                                                                  |                                                                                                                                                                                                                                                              | 8 Don't know, no opinion, or not sure                                                  |

|     |                                                                                                                                                                                                                                                                      |                                                      |                            |          |          |
|-----|----------------------------------------------------------------------------------------------------------------------------------------------------------------------------------------------------------------------------------------------------------------------|------------------------------------------------------|----------------------------|----------|----------|
| 304 | Do you think the law should allow abortion in the following situations?<br><br><b>[U = unsure, undecided, "it depends." U is a catch-all category for nuanced or ambivalent opinions.]</b><br><br><b>[Interviewer: Please read each reason and record response.]</b> |                                                      | <b>Y</b>                   | <b>N</b> | <b>U</b> |
|     |                                                                                                                                                                                                                                                                      | a. if the woman's physical health is at risk         | 1                          | 0        | 8        |
|     |                                                                                                                                                                                                                                                                      | b. if the woman is mentally incapacitated            | 1                          | 0        | 8        |
|     |                                                                                                                                                                                                                                                                      | m                                                    | 1                          | 0        | 8        |
|     |                                                                                                                                                                                                                                                                      | d. if the girl or woman is still in school           | 1                          | 0        | 8        |
|     |                                                                                                                                                                                                                                                                      | e. if a girl is under age 18                         | 1                          | 0        | 8        |
|     |                                                                                                                                                                                                                                                                      | f. economic reasons (e.g. cannot care for the child) | 1                          | 0        | 8        |
|     |                                                                                                                                                                                                                                                                      | g. If the woman or girl is unmarried                 | 1                          | 0        | 8        |
|     |                                                                                                                                                                                                                                                                      | h. if pregnancy is from rape                         | 1                          | 0        | 8        |
|     |                                                                                                                                                                                                                                                                      | i. if pregnancy is from incest                       | 1                          | 0        | 8        |
|     |                                                                                                                                                                                                                                                                      | j. If pregnancy is from contraceptive failure        | 1                          | 0        | 8        |
|     |                                                                                                                                                                                                                                                                      | k. if baby would be handicapped/foetal anomaly       | 1                          | 0        | 8        |
|     |                                                                                                                                                                                                                                                                      | l. if the woman doesn't want the pregnancy           | 1                          | 0        | 8        |
|     |                                                                                                                                                                                                                                                                      | x. other (specify)<br>_____<br>_____                 | 1                          | 0        | 8        |
| 305 | Has your facility ever provided an abortion to save a woman's life (within the Malawian law)?                                                                                                                                                                        | <input type="checkbox"/>                             |                            |          |          |
|     |                                                                                                                                                                                                                                                                      | 0                                                    | No <b>[Go to module 4]</b> |          |          |
|     |                                                                                                                                                                                                                                                                      | 1                                                    | Yes                        |          |          |
| 306 | How many times has this happened during the last 6 months, during the last 12 months, and during the last 5 years?                                                                                                                                                   | a. During the last 6 months <input type="text"/>     |                            |          |          |
|     |                                                                                                                                                                                                                                                                      | b. During the last 12 months <input type="text"/>    |                            |          |          |
|     |                                                                                                                                                                                                                                                                      | c. During the last 5 years <input type="text"/>      |                            |          |          |

| <b>Module 4: Abortion reporting</b>                                                                                    |                                                                                                                                                                                                                                                                                                                                                                                                                                 |                                                                                                                                                                                                                                                                                                                                                                                                                                                                                                                                                                                                                                                                                                                                                                                                                                                                                                                                                                                                                                                                                                                                                                                                                                                                                                                                                                                                                                                                                                                                                                                                                                                                                                                                                                                                                                                                                                                                                                                                                                                                                                                                                                                                                                                                                                                                                                                                                                                                                                                                                                                                                                                                                                                                                                                                                                                                                                                                                                                                                                                                                                                                                                                                                                                                                                                                    |   |                      |             |                              |   |                                                          |   |                  |  |             |  |  |  |  |  |            |  |  |  |  |  |       |  |  |  |  |  |             |  |  |  |  |  |            |  |  |  |  |  |       |  |  |  |  |  |             |  |  |  |  |  |            |  |  |  |  |  |       |
|------------------------------------------------------------------------------------------------------------------------|---------------------------------------------------------------------------------------------------------------------------------------------------------------------------------------------------------------------------------------------------------------------------------------------------------------------------------------------------------------------------------------------------------------------------------|------------------------------------------------------------------------------------------------------------------------------------------------------------------------------------------------------------------------------------------------------------------------------------------------------------------------------------------------------------------------------------------------------------------------------------------------------------------------------------------------------------------------------------------------------------------------------------------------------------------------------------------------------------------------------------------------------------------------------------------------------------------------------------------------------------------------------------------------------------------------------------------------------------------------------------------------------------------------------------------------------------------------------------------------------------------------------------------------------------------------------------------------------------------------------------------------------------------------------------------------------------------------------------------------------------------------------------------------------------------------------------------------------------------------------------------------------------------------------------------------------------------------------------------------------------------------------------------------------------------------------------------------------------------------------------------------------------------------------------------------------------------------------------------------------------------------------------------------------------------------------------------------------------------------------------------------------------------------------------------------------------------------------------------------------------------------------------------------------------------------------------------------------------------------------------------------------------------------------------------------------------------------------------------------------------------------------------------------------------------------------------------------------------------------------------------------------------------------------------------------------------------------------------------------------------------------------------------------------------------------------------------------------------------------------------------------------------------------------------------------------------------------------------------------------------------------------------------------------------------------------------------------------------------------------------------------------------------------------------------------------------------------------------------------------------------------------------------------------------------------------------------------------------------------------------------------------------------------------------------------------------------------------------------------------------------------------------|---|----------------------|-------------|------------------------------|---|----------------------------------------------------------|---|------------------|--|-------------|--|--|--|--|--|------------|--|--|--|--|--|-------|--|--|--|--|--|-------------|--|--|--|--|--|------------|--|--|--|--|--|-------|--|--|--|--|--|-------------|--|--|--|--|--|------------|--|--|--|--|--|-------|
| 401                                                                                                                    | <p>Do you keep or compile records on the number of women treated for abortion complications at this facility?</p>                                                                                                                                                                                                                                                                                                               | <table border="1" style="margin-left: auto; margin-right: auto;"> <tr><td style="width: 30px; text-align: center;">0</td><td>No</td></tr> <tr><td style="width: 30px; text-align: center;">1</td><td>Yes</td></tr> </table> <p style="margin-left: 100px;"><b>[End interview here.]</b></p>                                                                                                                                                                                                                                                                                                                                                                                                                                                                                                                                                                                                                                                                                                                                                                                                                                                                                                                                                                                                                                                                                                                                                                                                                                                                                                                                                                                                                                                                                                                                                                                                                                                                                                                                                                                                                                                                                                                                                                                                                                                                                                                                                                                                                                                                                                                                                                                                                                                                                                                                                                                                                                                                                                                                                                                                                                                                                                                                                                                                                                        | 0 | No                   | 1           | Yes                          |   |                                                          |   |                  |  |             |  |  |  |  |  |            |  |  |  |  |  |       |  |  |  |  |  |             |  |  |  |  |  |            |  |  |  |  |  |       |  |  |  |  |  |             |  |  |  |  |  |            |  |  |  |  |  |       |
| 0                                                                                                                      | No                                                                                                                                                                                                                                                                                                                                                                                                                              |                                                                                                                                                                                                                                                                                                                                                                                                                                                                                                                                                                                                                                                                                                                                                                                                                                                                                                                                                                                                                                                                                                                                                                                                                                                                                                                                                                                                                                                                                                                                                                                                                                                                                                                                                                                                                                                                                                                                                                                                                                                                                                                                                                                                                                                                                                                                                                                                                                                                                                                                                                                                                                                                                                                                                                                                                                                                                                                                                                                                                                                                                                                                                                                                                                                                                                                                    |   |                      |             |                              |   |                                                          |   |                  |  |             |  |  |  |  |  |            |  |  |  |  |  |       |  |  |  |  |  |             |  |  |  |  |  |            |  |  |  |  |  |       |  |  |  |  |  |             |  |  |  |  |  |            |  |  |  |  |  |       |
| 1                                                                                                                      | Yes                                                                                                                                                                                                                                                                                                                                                                                                                             |                                                                                                                                                                                                                                                                                                                                                                                                                                                                                                                                                                                                                                                                                                                                                                                                                                                                                                                                                                                                                                                                                                                                                                                                                                                                                                                                                                                                                                                                                                                                                                                                                                                                                                                                                                                                                                                                                                                                                                                                                                                                                                                                                                                                                                                                                                                                                                                                                                                                                                                                                                                                                                                                                                                                                                                                                                                                                                                                                                                                                                                                                                                                                                                                                                                                                                                                    |   |                      |             |                              |   |                                                          |   |                  |  |             |  |  |  |  |  |            |  |  |  |  |  |       |  |  |  |  |  |             |  |  |  |  |  |            |  |  |  |  |  |       |  |  |  |  |  |             |  |  |  |  |  |            |  |  |  |  |  |       |
| 402                                                                                                                    | <p>How are these records kept?</p> <p><b>[If the facility keeps more than one type of records, circle the one that is the most complete and up-to-date.]</b></p>                                                                                                                                                                                                                                                                | <table border="1" style="margin-left: auto; margin-right: auto;"> <tr><td style="width: 30px; text-align: center;">1</td><td>Paper-based log book</td></tr> <tr><td style="width: 30px; text-align: center;">2</td><td>Electronic, just in facility</td></tr> <tr><td style="width: 30px; text-align: center;">3</td><td>Electronic, centralised in national or regional database</td></tr> <tr><td style="width: 30px; text-align: center;">4</td><td>Other (specify):</td></tr> </table>                                                                                                                                                                                                                                                                                                                                                                                                                                                                                                                                                                                                                                                                                                                                                                                                                                                                                                                                                                                                                                                                                                                                                                                                                                                                                                                                                                                                                                                                                                                                                                                                                                                                                                                                                                                                                                                                                                                                                                                                                                                                                                                                                                                                                                                                                                                                                                                                                                                                                                                                                                                                                                                                                                                                                                                                                                         | 1 | Paper-based log book | 2           | Electronic, just in facility | 3 | Electronic, centralised in national or regional database | 4 | Other (specify): |  |             |  |  |  |  |  |            |  |  |  |  |  |       |  |  |  |  |  |             |  |  |  |  |  |            |  |  |  |  |  |       |  |  |  |  |  |             |  |  |  |  |  |            |  |  |  |  |  |       |
| 1                                                                                                                      | Paper-based log book                                                                                                                                                                                                                                                                                                                                                                                                            |                                                                                                                                                                                                                                                                                                                                                                                                                                                                                                                                                                                                                                                                                                                                                                                                                                                                                                                                                                                                                                                                                                                                                                                                                                                                                                                                                                                                                                                                                                                                                                                                                                                                                                                                                                                                                                                                                                                                                                                                                                                                                                                                                                                                                                                                                                                                                                                                                                                                                                                                                                                                                                                                                                                                                                                                                                                                                                                                                                                                                                                                                                                                                                                                                                                                                                                                    |   |                      |             |                              |   |                                                          |   |                  |  |             |  |  |  |  |  |            |  |  |  |  |  |       |  |  |  |  |  |             |  |  |  |  |  |            |  |  |  |  |  |       |  |  |  |  |  |             |  |  |  |  |  |            |  |  |  |  |  |       |
| 2                                                                                                                      | Electronic, just in facility                                                                                                                                                                                                                                                                                                                                                                                                    |                                                                                                                                                                                                                                                                                                                                                                                                                                                                                                                                                                                                                                                                                                                                                                                                                                                                                                                                                                                                                                                                                                                                                                                                                                                                                                                                                                                                                                                                                                                                                                                                                                                                                                                                                                                                                                                                                                                                                                                                                                                                                                                                                                                                                                                                                                                                                                                                                                                                                                                                                                                                                                                                                                                                                                                                                                                                                                                                                                                                                                                                                                                                                                                                                                                                                                                                    |   |                      |             |                              |   |                                                          |   |                  |  |             |  |  |  |  |  |            |  |  |  |  |  |       |  |  |  |  |  |             |  |  |  |  |  |            |  |  |  |  |  |       |  |  |  |  |  |             |  |  |  |  |  |            |  |  |  |  |  |       |
| 3                                                                                                                      | Electronic, centralised in national or regional database                                                                                                                                                                                                                                                                                                                                                                        |                                                                                                                                                                                                                                                                                                                                                                                                                                                                                                                                                                                                                                                                                                                                                                                                                                                                                                                                                                                                                                                                                                                                                                                                                                                                                                                                                                                                                                                                                                                                                                                                                                                                                                                                                                                                                                                                                                                                                                                                                                                                                                                                                                                                                                                                                                                                                                                                                                                                                                                                                                                                                                                                                                                                                                                                                                                                                                                                                                                                                                                                                                                                                                                                                                                                                                                                    |   |                      |             |                              |   |                                                          |   |                  |  |             |  |  |  |  |  |            |  |  |  |  |  |       |  |  |  |  |  |             |  |  |  |  |  |            |  |  |  |  |  |       |  |  |  |  |  |             |  |  |  |  |  |            |  |  |  |  |  |       |
| 4                                                                                                                      | Other (specify):                                                                                                                                                                                                                                                                                                                                                                                                                |                                                                                                                                                                                                                                                                                                                                                                                                                                                                                                                                                                                                                                                                                                                                                                                                                                                                                                                                                                                                                                                                                                                                                                                                                                                                                                                                                                                                                                                                                                                                                                                                                                                                                                                                                                                                                                                                                                                                                                                                                                                                                                                                                                                                                                                                                                                                                                                                                                                                                                                                                                                                                                                                                                                                                                                                                                                                                                                                                                                                                                                                                                                                                                                                                                                                                                                                    |   |                      |             |                              |   |                                                          |   |                  |  |             |  |  |  |  |  |            |  |  |  |  |  |       |  |  |  |  |  |             |  |  |  |  |  |            |  |  |  |  |  |       |  |  |  |  |  |             |  |  |  |  |  |            |  |  |  |  |  |       |
| 403                                                                                                                    | <p>Is there any written information about the number of women treated in this health facility (for abortion complications) that you can give me?</p> <p><b>[Interviewer: Record details at right and indicate if you are attaching additional information. It's best to obtain the information after the interview so as not to interrupt the interview right now. Obtain a photocopy of actual records, if available.]</b></p> | <table border="1" style="margin-left: auto; margin-right: auto;"> <tr><td style="width: 30px; text-align: center;">0</td><td>No</td></tr> <tr><td style="width: 30px; text-align: center;">1</td><td>Yes</td></tr> </table> <p><b>No [End interview]</b></p> <p><b>IF YES:</b><br/>Details:</p> <p><b>Number of women treated for complications of abortion:</b></p> <p>a. In the last month:</p> <table style="margin-left: 20px;"> <tr><td style="width: 20px; border: 1px solid black;"> </td><td style="padding-left: 5px;">Outpatients</td></tr> <tr><td style="border: 1px solid black;"> </td><td style="padding-left: 5px;">Inpatients</td></tr> <tr><td style="border: 1px solid black;"> </td><td style="padding-left: 5px;">Total</td></tr> </table> <p>b. In the last quarter:</p> <table style="margin-left: 20px;"> <tr><td style="width: 20px; border: 1px solid black;"> </td><td style="padding-left: 5px;">Outpatients</td></tr> <tr><td style="border: 1px solid black;"> </td><td style="padding-left: 5px;">Inpatients</td></tr> <tr><td style="border: 1px solid black;"> </td><td style="padding-left: 5px;">Total</td></tr> </table> <p>c. During the year 2014:</p> <table style="margin-left: 20px;"> <tr><td style="width: 20px; border: 1px solid black;"> </td><td style="padding-left: 5px;">Outpatients</td></tr> <tr><td style="border: 1px solid black;"> </td><td style="padding-left: 5px;">Inpatients</td></tr> <tr><td style="border: 1px solid black;"> </td><td style="padding-left: 5px;">Total</td></tr> </table> | 0 | No                   | 1           | Yes                          |   |                                                          |   |                  |  | Outpatients |  |  |  |  |  | Inpatients |  |  |  |  |  | Total |  |  |  |  |  | Outpatients |  |  |  |  |  | Inpatients |  |  |  |  |  | Total |  |  |  |  |  | Outpatients |  |  |  |  |  | Inpatients |  |  |  |  |  | Total |
| 0                                                                                                                      | No                                                                                                                                                                                                                                                                                                                                                                                                                              |                                                                                                                                                                                                                                                                                                                                                                                                                                                                                                                                                                                                                                                                                                                                                                                                                                                                                                                                                                                                                                                                                                                                                                                                                                                                                                                                                                                                                                                                                                                                                                                                                                                                                                                                                                                                                                                                                                                                                                                                                                                                                                                                                                                                                                                                                                                                                                                                                                                                                                                                                                                                                                                                                                                                                                                                                                                                                                                                                                                                                                                                                                                                                                                                                                                                                                                                    |   |                      |             |                              |   |                                                          |   |                  |  |             |  |  |  |  |  |            |  |  |  |  |  |       |  |  |  |  |  |             |  |  |  |  |  |            |  |  |  |  |  |       |  |  |  |  |  |             |  |  |  |  |  |            |  |  |  |  |  |       |
| 1                                                                                                                      | Yes                                                                                                                                                                                                                                                                                                                                                                                                                             |                                                                                                                                                                                                                                                                                                                                                                                                                                                                                                                                                                                                                                                                                                                                                                                                                                                                                                                                                                                                                                                                                                                                                                                                                                                                                                                                                                                                                                                                                                                                                                                                                                                                                                                                                                                                                                                                                                                                                                                                                                                                                                                                                                                                                                                                                                                                                                                                                                                                                                                                                                                                                                                                                                                                                                                                                                                                                                                                                                                                                                                                                                                                                                                                                                                                                                                                    |   |                      |             |                              |   |                                                          |   |                  |  |             |  |  |  |  |  |            |  |  |  |  |  |       |  |  |  |  |  |             |  |  |  |  |  |            |  |  |  |  |  |       |  |  |  |  |  |             |  |  |  |  |  |            |  |  |  |  |  |       |
|                                                                                                                        |                                                                                                                                                                                                                                                                                                                                                                                                                                 |                                                                                                                                                                                                                                                                                                                                                                                                                                                                                                                                                                                                                                                                                                                                                                                                                                                                                                                                                                                                                                                                                                                                                                                                                                                                                                                                                                                                                                                                                                                                                                                                                                                                                                                                                                                                                                                                                                                                                                                                                                                                                                                                                                                                                                                                                                                                                                                                                                                                                                                                                                                                                                                                                                                                                                                                                                                                                                                                                                                                                                                                                                                                                                                                                                                                                                                                    |   |                      | Outpatients |                              |   |                                                          |   |                  |  |             |  |  |  |  |  |            |  |  |  |  |  |       |  |  |  |  |  |             |  |  |  |  |  |            |  |  |  |  |  |       |  |  |  |  |  |             |  |  |  |  |  |            |  |  |  |  |  |       |
|                                                                                                                        |                                                                                                                                                                                                                                                                                                                                                                                                                                 |                                                                                                                                                                                                                                                                                                                                                                                                                                                                                                                                                                                                                                                                                                                                                                                                                                                                                                                                                                                                                                                                                                                                                                                                                                                                                                                                                                                                                                                                                                                                                                                                                                                                                                                                                                                                                                                                                                                                                                                                                                                                                                                                                                                                                                                                                                                                                                                                                                                                                                                                                                                                                                                                                                                                                                                                                                                                                                                                                                                                                                                                                                                                                                                                                                                                                                                                    |   |                      | Inpatients  |                              |   |                                                          |   |                  |  |             |  |  |  |  |  |            |  |  |  |  |  |       |  |  |  |  |  |             |  |  |  |  |  |            |  |  |  |  |  |       |  |  |  |  |  |             |  |  |  |  |  |            |  |  |  |  |  |       |
|                                                                                                                        |                                                                                                                                                                                                                                                                                                                                                                                                                                 |                                                                                                                                                                                                                                                                                                                                                                                                                                                                                                                                                                                                                                                                                                                                                                                                                                                                                                                                                                                                                                                                                                                                                                                                                                                                                                                                                                                                                                                                                                                                                                                                                                                                                                                                                                                                                                                                                                                                                                                                                                                                                                                                                                                                                                                                                                                                                                                                                                                                                                                                                                                                                                                                                                                                                                                                                                                                                                                                                                                                                                                                                                                                                                                                                                                                                                                                    |   |                      | Total       |                              |   |                                                          |   |                  |  |             |  |  |  |  |  |            |  |  |  |  |  |       |  |  |  |  |  |             |  |  |  |  |  |            |  |  |  |  |  |       |  |  |  |  |  |             |  |  |  |  |  |            |  |  |  |  |  |       |
|                                                                                                                        |                                                                                                                                                                                                                                                                                                                                                                                                                                 |                                                                                                                                                                                                                                                                                                                                                                                                                                                                                                                                                                                                                                                                                                                                                                                                                                                                                                                                                                                                                                                                                                                                                                                                                                                                                                                                                                                                                                                                                                                                                                                                                                                                                                                                                                                                                                                                                                                                                                                                                                                                                                                                                                                                                                                                                                                                                                                                                                                                                                                                                                                                                                                                                                                                                                                                                                                                                                                                                                                                                                                                                                                                                                                                                                                                                                                                    |   |                      | Outpatients |                              |   |                                                          |   |                  |  |             |  |  |  |  |  |            |  |  |  |  |  |       |  |  |  |  |  |             |  |  |  |  |  |            |  |  |  |  |  |       |  |  |  |  |  |             |  |  |  |  |  |            |  |  |  |  |  |       |
|                                                                                                                        |                                                                                                                                                                                                                                                                                                                                                                                                                                 |                                                                                                                                                                                                                                                                                                                                                                                                                                                                                                                                                                                                                                                                                                                                                                                                                                                                                                                                                                                                                                                                                                                                                                                                                                                                                                                                                                                                                                                                                                                                                                                                                                                                                                                                                                                                                                                                                                                                                                                                                                                                                                                                                                                                                                                                                                                                                                                                                                                                                                                                                                                                                                                                                                                                                                                                                                                                                                                                                                                                                                                                                                                                                                                                                                                                                                                                    |   |                      | Inpatients  |                              |   |                                                          |   |                  |  |             |  |  |  |  |  |            |  |  |  |  |  |       |  |  |  |  |  |             |  |  |  |  |  |            |  |  |  |  |  |       |  |  |  |  |  |             |  |  |  |  |  |            |  |  |  |  |  |       |
|                                                                                                                        |                                                                                                                                                                                                                                                                                                                                                                                                                                 |                                                                                                                                                                                                                                                                                                                                                                                                                                                                                                                                                                                                                                                                                                                                                                                                                                                                                                                                                                                                                                                                                                                                                                                                                                                                                                                                                                                                                                                                                                                                                                                                                                                                                                                                                                                                                                                                                                                                                                                                                                                                                                                                                                                                                                                                                                                                                                                                                                                                                                                                                                                                                                                                                                                                                                                                                                                                                                                                                                                                                                                                                                                                                                                                                                                                                                                                    |   |                      | Total       |                              |   |                                                          |   |                  |  |             |  |  |  |  |  |            |  |  |  |  |  |       |  |  |  |  |  |             |  |  |  |  |  |            |  |  |  |  |  |       |  |  |  |  |  |             |  |  |  |  |  |            |  |  |  |  |  |       |
|                                                                                                                        |                                                                                                                                                                                                                                                                                                                                                                                                                                 |                                                                                                                                                                                                                                                                                                                                                                                                                                                                                                                                                                                                                                                                                                                                                                                                                                                                                                                                                                                                                                                                                                                                                                                                                                                                                                                                                                                                                                                                                                                                                                                                                                                                                                                                                                                                                                                                                                                                                                                                                                                                                                                                                                                                                                                                                                                                                                                                                                                                                                                                                                                                                                                                                                                                                                                                                                                                                                                                                                                                                                                                                                                                                                                                                                                                                                                                    |   |                      | Outpatients |                              |   |                                                          |   |                  |  |             |  |  |  |  |  |            |  |  |  |  |  |       |  |  |  |  |  |             |  |  |  |  |  |            |  |  |  |  |  |       |  |  |  |  |  |             |  |  |  |  |  |            |  |  |  |  |  |       |
|                                                                                                                        |                                                                                                                                                                                                                                                                                                                                                                                                                                 |                                                                                                                                                                                                                                                                                                                                                                                                                                                                                                                                                                                                                                                                                                                                                                                                                                                                                                                                                                                                                                                                                                                                                                                                                                                                                                                                                                                                                                                                                                                                                                                                                                                                                                                                                                                                                                                                                                                                                                                                                                                                                                                                                                                                                                                                                                                                                                                                                                                                                                                                                                                                                                                                                                                                                                                                                                                                                                                                                                                                                                                                                                                                                                                                                                                                                                                                    |   |                      | Inpatients  |                              |   |                                                          |   |                  |  |             |  |  |  |  |  |            |  |  |  |  |  |       |  |  |  |  |  |             |  |  |  |  |  |            |  |  |  |  |  |       |  |  |  |  |  |             |  |  |  |  |  |            |  |  |  |  |  |       |
|                                                                                                                        |                                                                                                                                                                                                                                                                                                                                                                                                                                 |                                                                                                                                                                                                                                                                                                                                                                                                                                                                                                                                                                                                                                                                                                                                                                                                                                                                                                                                                                                                                                                                                                                                                                                                                                                                                                                                                                                                                                                                                                                                                                                                                                                                                                                                                                                                                                                                                                                                                                                                                                                                                                                                                                                                                                                                                                                                                                                                                                                                                                                                                                                                                                                                                                                                                                                                                                                                                                                                                                                                                                                                                                                                                                                                                                                                                                                                    |   |                      | Total       |                              |   |                                                          |   |                  |  |             |  |  |  |  |  |            |  |  |  |  |  |       |  |  |  |  |  |             |  |  |  |  |  |            |  |  |  |  |  |       |  |  |  |  |  |             |  |  |  |  |  |            |  |  |  |  |  |       |
| <p><b>END: Thank the respondent for their time.</b></p> <p><b>(Interview: Remember to note time on title page)</b></p> |                                                                                                                                                                                                                                                                                                                                                                                                                                 |                                                                                                                                                                                                                                                                                                                                                                                                                                                                                                                                                                                                                                                                                                                                                                                                                                                                                                                                                                                                                                                                                                                                                                                                                                                                                                                                                                                                                                                                                                                                                                                                                                                                                                                                                                                                                                                                                                                                                                                                                                                                                                                                                                                                                                                                                                                                                                                                                                                                                                                                                                                                                                                                                                                                                                                                                                                                                                                                                                                                                                                                                                                                                                                                                                                                                                                                    |   |                      |             |                              |   |                                                          |   |                  |  |             |  |  |  |  |  |            |  |  |  |  |  |       |  |  |  |  |  |             |  |  |  |  |  |            |  |  |  |  |  |       |  |  |  |  |  |             |  |  |  |  |  |            |  |  |  |  |  |       |
